# Supplementary material for: Effective treatment of malignant atrophic papulosis (Köhlmeier-Degos disease) with treprostinil – early experience
Source: PubMed Central journal article supplement (PMC3636001; doi:10.1186/1750-1172-8-52), 2013-04-04
Supplement: 1750-1172-8-52-S1.pdf [file 1750-1172-8-52-S1.pdf]

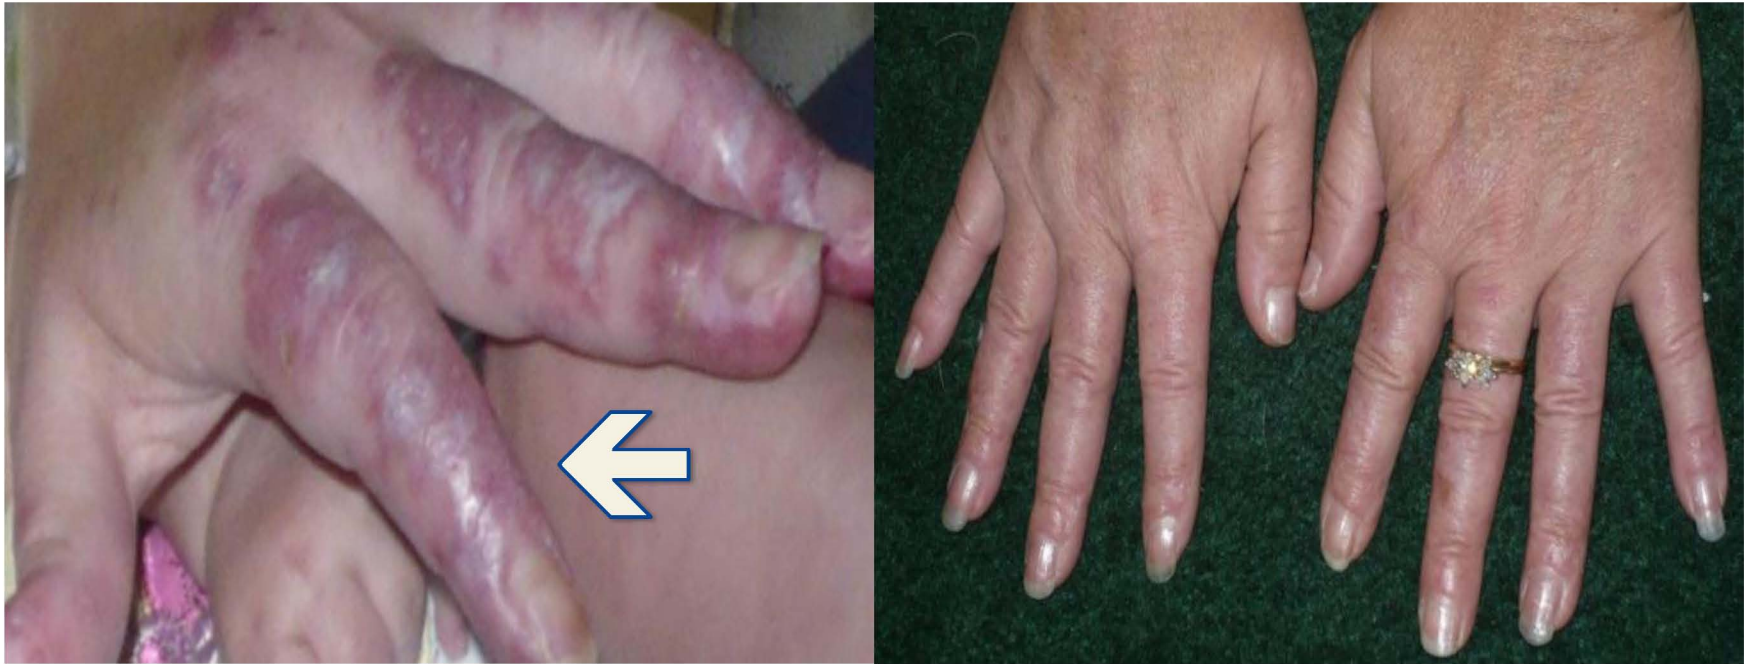

(Image One)

**Left:** Patient 1 – extensive avascular lesions with telangiectatic borders at her digits and hands before treatment with treprostinil **Right:** Patient one – after treatment with treprostinil.
