# Supplementary material for: Effective treatment of malignant atrophic papulosis (Köhlmeier-Degos disease) with treprostinil – early experience
Source: PubMed Central journal article supplement (PMC3636001; doi:10.1186/1750-1172-8-52), 2013-04-04
Supplement: 1750-1172-8-52-S2.pdf [file 1750-1172-8-52-S2.pdf]

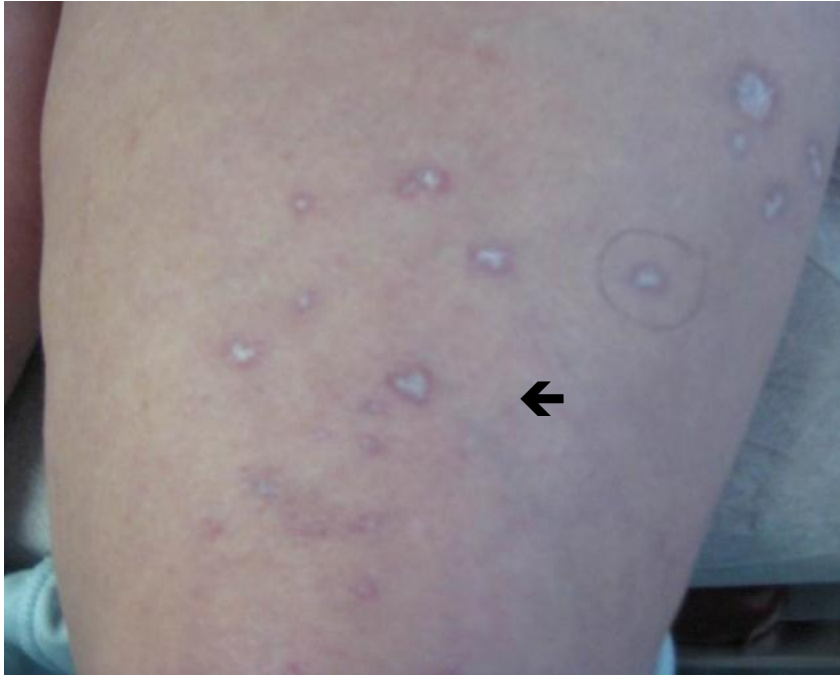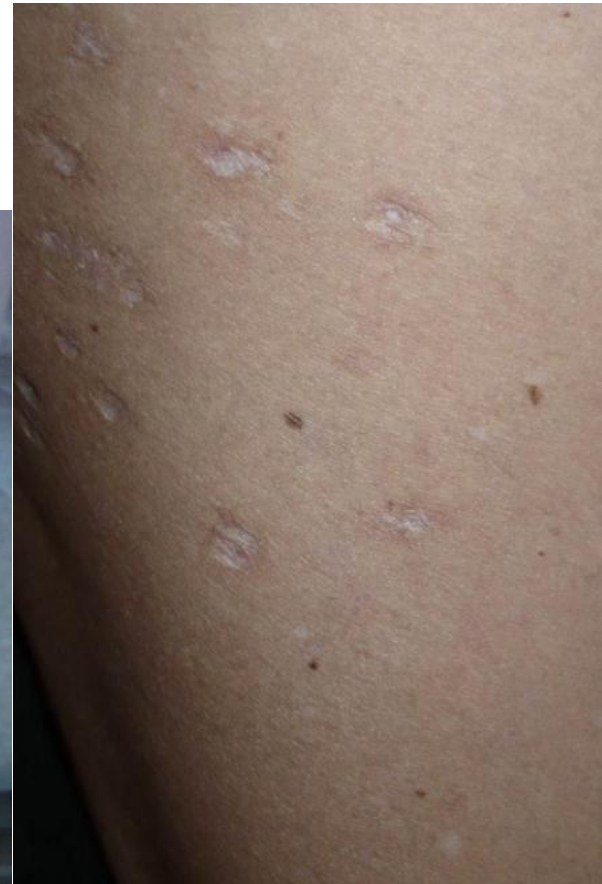

(Image Two)

Left – Patient one lower extremity before treatment with treprostinil. Right – patient one lower extremity after treatment with treprostinil.
